# Supplementary material for: Extending wind profile beyond the surface layer by combining physical and machine learning approaches
Source: Copernicus journal article supplement (doi:10.5194/egusphere-2023-2727), 2023-12-11
Supplement: Supplementary file 1 [file egusphere-2023-2727-supplement.pdf]

**Supplementary Materials for**

**Extending wind profile beyond the surface layer by  
combining physical and machine learning approaches**

Boming Liu<sup>1</sup>, Xin Ma<sup>1</sup>, Jianping Guo<sup>2\*</sup>, Hui Li<sup>1</sup>, Shikuan Jin<sup>1</sup>, Yingying Ma<sup>1</sup>, and Wei Gong<sup>1</sup>

<sup>1</sup> State Key Laboratory of Information Engineering in Surveying, Mapping and Remote Sensing (LIESMARS), Wuhan University, Wuhan, China

<sup>2</sup> State Key Laboratory of Severe Weather, Chinese Academy of Meteorological Sciences, Beijing 100081, China

*Correspondence to:* Jianping Guo ([jpguocams@gmail.com](mailto:jpguocams@gmail.com))

**This PDF file includes:**

Table S1

Figure S1

Figure S2

Figure S3

Figure S4

Figure S5

Figure S6

Figure S7

Figure S8

**Table S1.** Power law exponent of various terrain.

| <b>Terrain type</b>                   | <b>Power law exponent</b> |
|---------------------------------------|---------------------------|
| Lake, ocean, and smooth hard ground   | 0.10                      |
| Foot high grass on ground level       | 0.15                      |
| Tall crops, hedges, and shrubs        | 0.20                      |
| Wooded country                        | 0.25                      |
| Small town with some trees and shrubs | 0.30                      |
| City area with tall buildings         | 0.40                      |

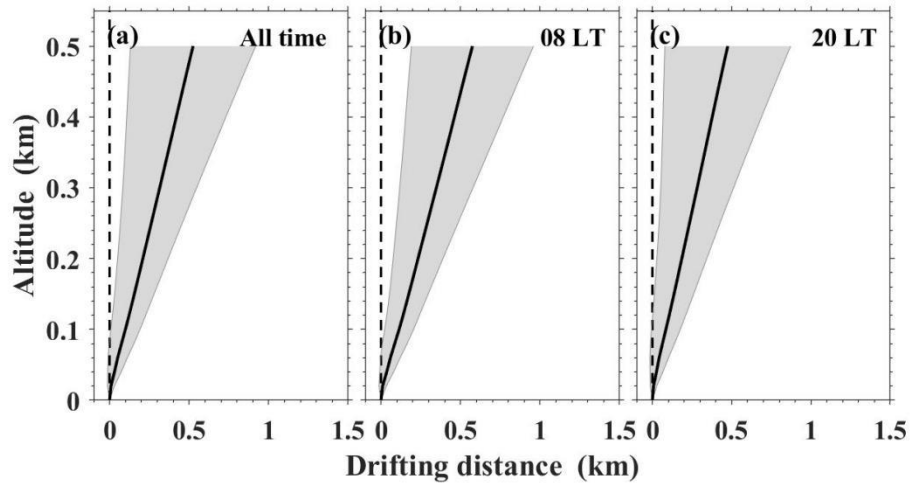

**Figure S1.** The drifting distance of RS observations over China. Black line represents mean drifting distance between the coordinates of RS and observation stations. Corresponding color shading areas represent the standard deviation.

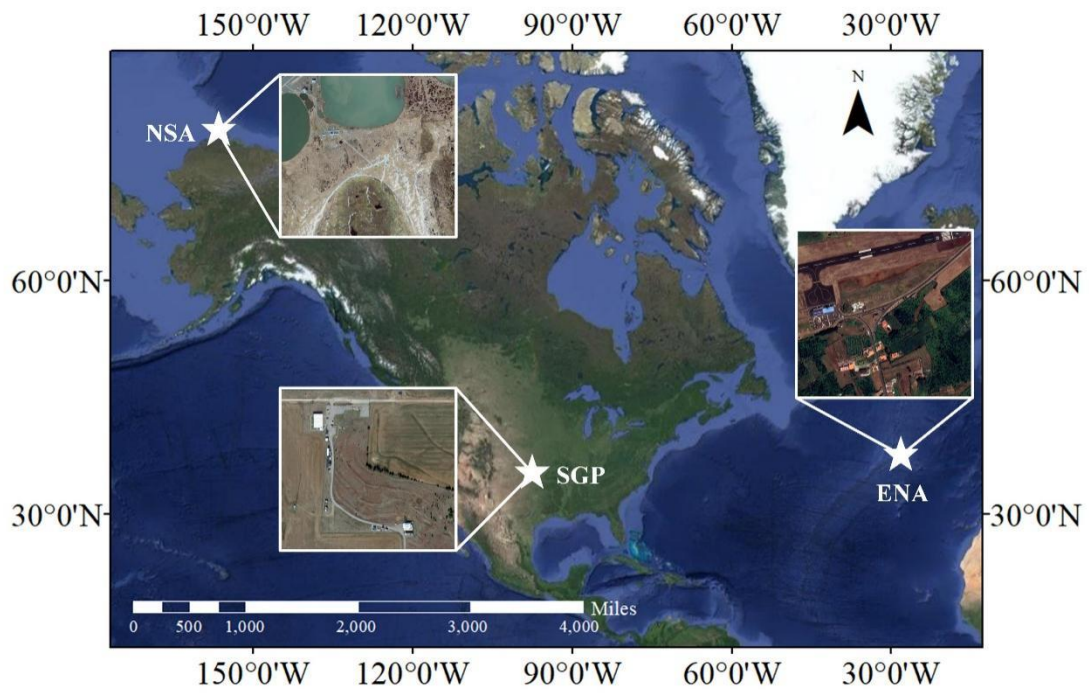

**Figure S2.** Geographical distribution and surface land cover type of three ARM station. The surface type photo is provided by Google Earth (© Google Maps).

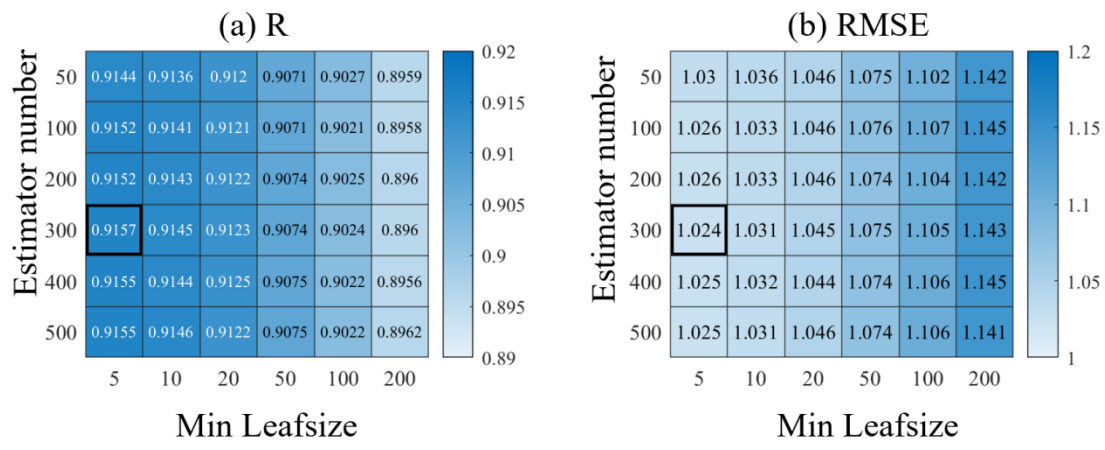

**Figure S3.** The (a) R and (b) RMSE distribution of RF with different parameters.

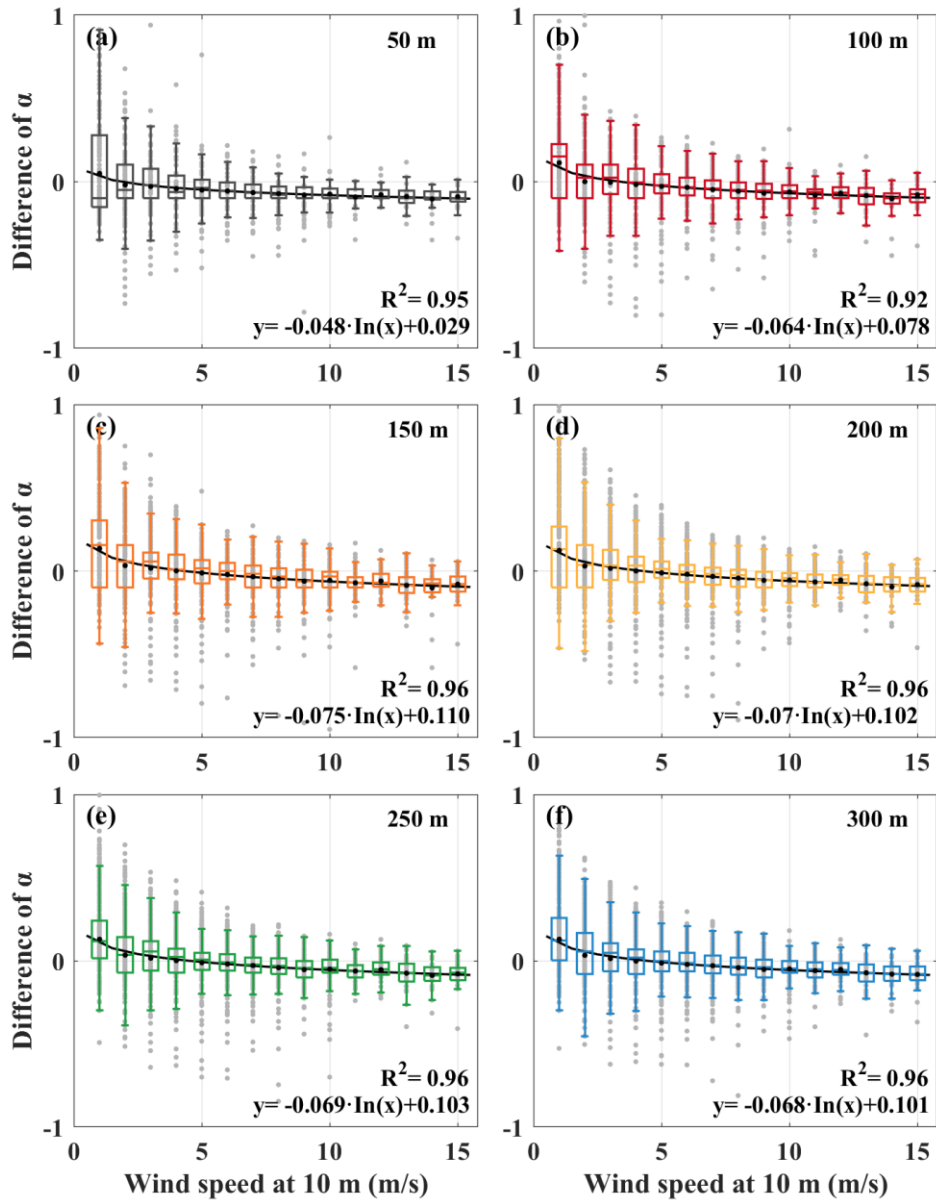

**Figure S4.** The  $\alpha$  bias (assumed value minus observed value) as a function of surface wind speed at (a) 50 m, (b) 100 m, (c) 150 m, (d) 200 m, (e) 250 m, and (f) 300 m.

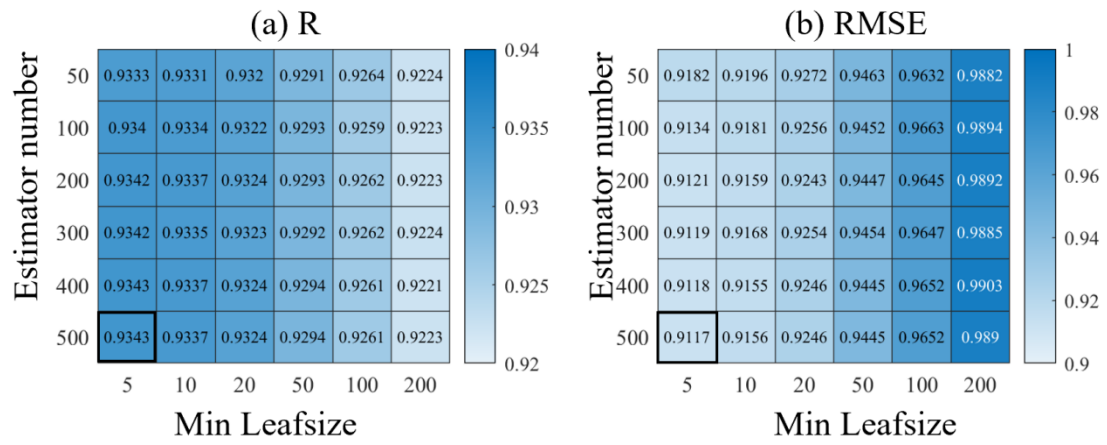

**Figure S5.** The (a) R and (b) RMSE distribution of Phy-RF with different parameters.

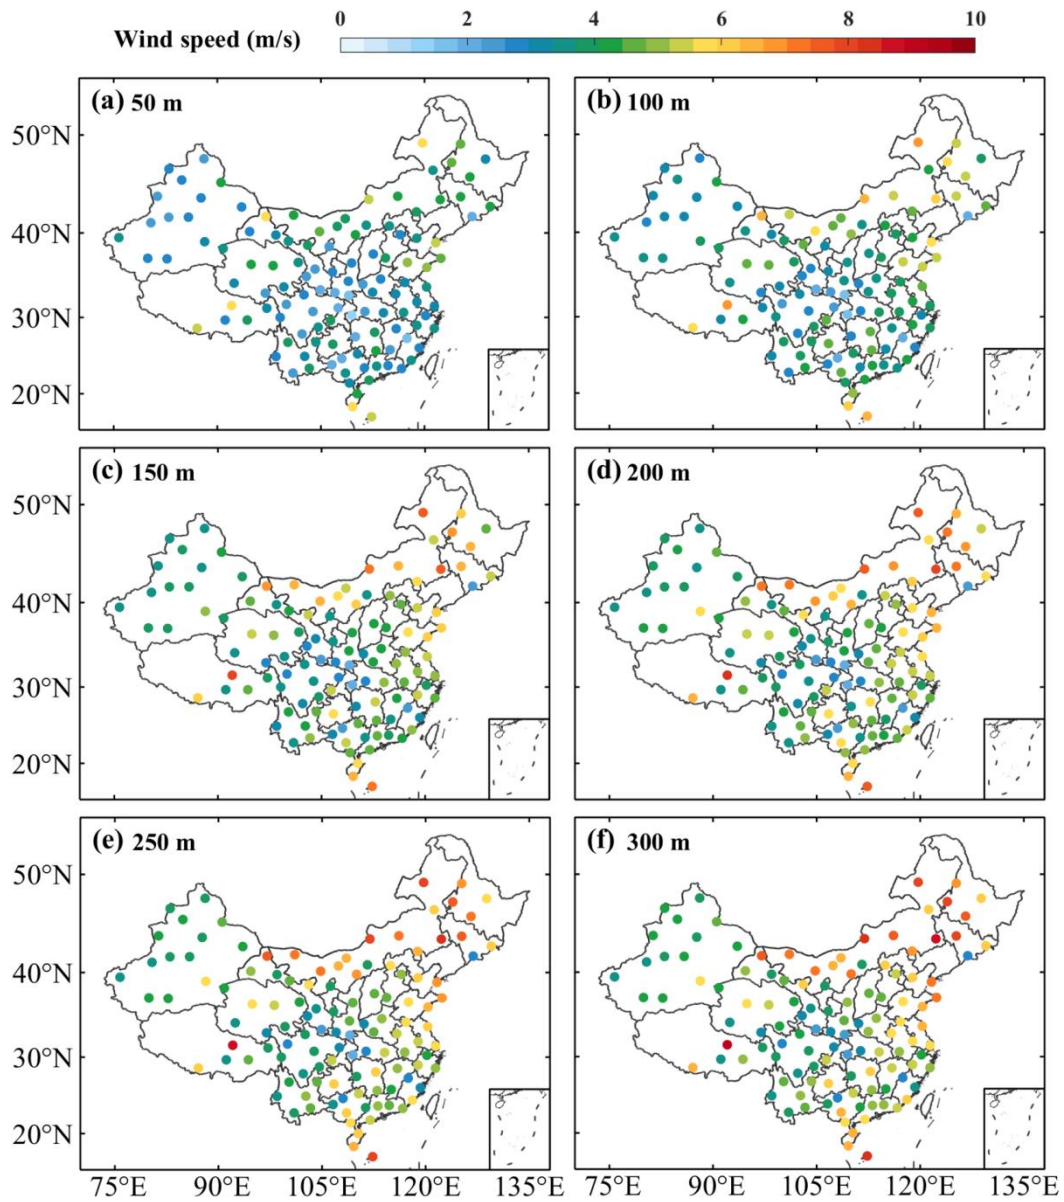

**Figure S6.** The spatial distributions of the estimated wind speed by the Phy-RF model over 120 radiosonde stations in China at different heights: (a) 50 m, (b) 100 m, (c) 150 m, (d) 200 m, (e) 250 m, (f) 300 m.



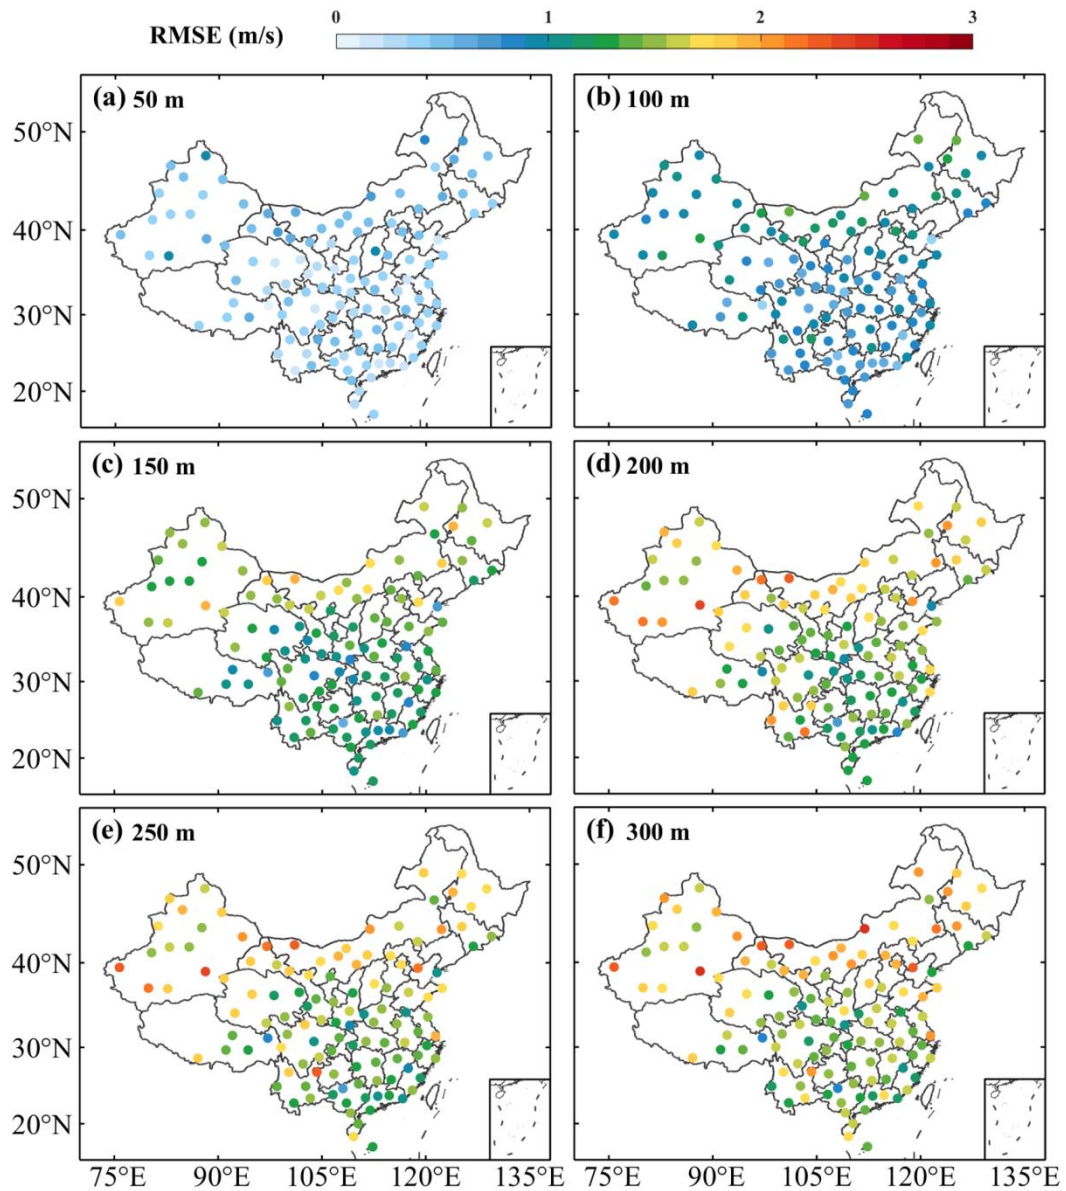

**Figure S7.** The spatial distributions of the RMSE between the estimated wind speed and observed wind speed for the Phy-RF model over 120 radiosonde stations in China at different heights: (a) 50 m, (b) 100 m, (c) 150 m, (d) 200 m, (e) 250 m, (f) 300 m.

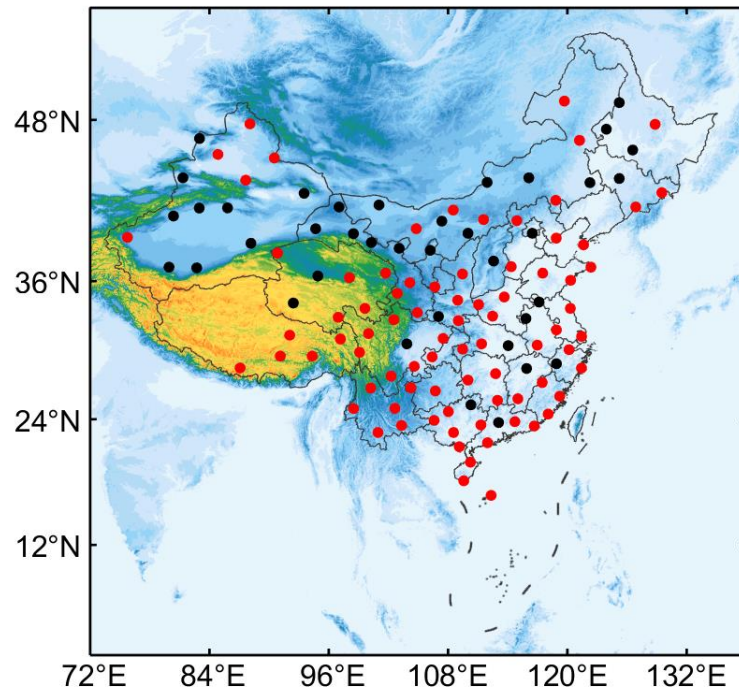

**Figure S8.** Geographical distribution of the radiosonde stations in China. Colorbar represents elevation. Red and black dots represent plain and highland sites, respectively.
